# Supplementary material
Source: PubMed Central journal article supplement (PMC3624805)
Supplement: supp_btt085_nozzle_supplementary-information_revision_v1.pdf [file supp_btt085_nozzle_supplementary-information_revision_v1.pdf]

## Nozzle: a report generation toolkit for data analysis pipelines

Nils Gehlenborg<sup>1,2</sup>, Michael S. Noble<sup>2</sup>, Gad Getz<sup>2</sup>, Lynda Chin<sup>2,3</sup> and Peter J. Park<sup>1,\*</sup>

<sup>1</sup>Center for Biomedical Informatics, Harvard Medical School, Boston, MA, USA

<sup>2</sup>Cancer Program, Broad Institute, Cambridge, MA, USA

<sup>3</sup>Department of Genomic Medicine, MD Anderson Cancer Center, Houston, TX, USA

**My Report**

- **My Section**
  - **My Subsection 1**

**Table 1. Iris data.**

| Sepal.Length | Sepal.Width | Petal.Length | Petal.Width | Species    |
|--------------|-------------|--------------|-------------|------------|
| 4.6          | 3.2         | 1.4          | 0.2         | setosa     |
| 4.8          | 3           | 1.4          | 0.3         | setosa     |
| 5            | 3.3         | 1.4          | 0.2         | setosa     |
| 5.1          | 3.8         | 1.9          | 0.4         | setosa     |
| 5.1          | 3.8         | 1.6          | 0.2         | setosa     |
| 5.3          | 3.7         | 1.5          | 0.2         | setosa     |
| 5.5          | 2.3         | 4            | 1.3         | versicolor |
| 6.4          | 3.2         | 4.5          | 1.5         | versicolor |
| 6.5          | 2.8         | 4.6          | 1.5         | versicolor |
| 6.9          | 3.1         | 4.9          | 1.5         | versicolor |
| 7            | 3.2         | 4.7          | 1.4         | versicolor |
  - **My Subsection 2**

Some sample text.

**Fig. S1.** A basic Nozzle report generated with the R script shown in Fig. 1. All sections and subsections are expanded. The table is sorted ascendingly by “Sepal.Length”. The table can be sorted by other variables by clicking on the corresponding column headers.
